# Supplementary material for: Colloidal stabilities and deposition behaviors of chromium (hydr)oxides in the presence of dissolved organic matters: role of coprecipitation and adsorption
Source: Royal Society of Chemistry journal article supplement (doi:10.1039/d2en00136e), 2022-01-01
Supplement: d2en00136e1.pdf [file d2en00136e1.pdf]

*Supplementary Materials*

**Colloidal Stability and Deposition Behavior of Chromium (Hydr)oxide In the Presence of Dissolved Organic Matter: Role of Coprecipitation and Adsorption**

*Shishu Zhu,<sup>a</sup> Yijun Mo,<sup>a</sup> Jia Xing,<sup>b</sup> Wendan Luo,<sup>a</sup> Chao Jin,<sup>a,\*</sup> Rongliang Qiu<sup>a,c</sup>*

<sup>a</sup> School of Environmental Science and Engineering, Guangdong Provincial Key Laboratory of Environmental Pollution Control and Remediation Technology, Sun Yat-Sen University, Guangzhou 510275, PR China

<sup>b</sup> Guangdong Provincial Key Laboratory of Microbial Culture Collection and Application, State Key Laboratory of Applied Microbiology Southern China, Guangdong Institute of Microbiology, Guangdong Academy of Science, Guangzhou 510070, PR China

<sup>c</sup> Guangdong Laboratory for Lingnan Modern Agriculture, College of Natural Resources and Environment, South China Agricultural University, Guangzhou 510642, China

---

**\*Corresponding Author:**

*Chao Jin*, E-mail: [jinchao3@mail.sysu.edu.cn](mailto:jinchao3@mail.sysu.edu.cn)

**Table S1.** Properties of SLOM. C1-C4 represented the components in EEM spectrum.

| DOC (mg L <sup>-1</sup> ) | SUVA <sub>254</sub> | C1 (%) | C2 (%) | C3 (%) | C4 (%) | Zeta Potential (mV) | r <sub>D</sub> (Hz s <sup>-1</sup> ) |
|---------------------------|---------------------|--------|--------|--------|--------|---------------------|--------------------------------------|
| 24.1±1.6                  | 12.6±0.9            | 45.8   | 32.9   | 20.3   | 1.1    | -45.6               | 0.023                                |

**Table S2.** Surface elemental composition of Cr (hydr)oxides in the presence of SLOM detected using XPS under different reaction time.

|                 | Cr <sub>2</sub> O <sub>3</sub> |             |             | Cr <sub>2</sub> CuO <sub>4</sub> |             |             | Cr(OH) <sub>3</sub> |             |             |             |
|-----------------|--------------------------------|-------------|-------------|----------------------------------|-------------|-------------|---------------------|-------------|-------------|-------------|
|                 | 1 hour                         | 2 hours     | 3 hours     | 1 hour                           | 2 hours     | 3 hours     | 1 hour              | 2 hours     | 3 hours     |             |
| C 1s            | 26.32                          | 31.34       | 24.21       | 60.15                            | 50.46       | 51.2        | 28.43               | 32.35       | 20.57       |             |
| Cr 2p           | 23.19                          | 18.21       | 18.69       | 6.73                             | 6.04        | 2.68        | 8.96                | 8.0         | 2.25        |             |
| O 1s            | 49.73                          | 49.11       | 56.18       | 6.55                             | 6.25        | 2.77        | 61.17               | 57.45       | 76.05       |             |
| N 1s            | 0.76                           | 1.35        | 0.92        | 25.82                            | 35.71       | 42.4        | 1.44                | 2.21        | 1.13        |             |
|                 |                                |             |             | N 1s                             | 0.75        | 1.54        | 0.95                |             |             |             |
| <b>TOCC/Cr*</b> | <b>1.13</b>                    | <b>1.72</b> | <b>1.29</b> |                                  | <b>4.52</b> | <b>4.11</b> | <b>9.39</b>         | <b>3.17</b> | <b>4.04</b> | <b>9.14</b> |

\* Denominator referred to the Cr atomic content for Cr<sub>2</sub>O<sub>3</sub> and Cr(OH)<sub>3</sub>, but referred to the sum of Cr and Cu atomic content for Cr<sub>2</sub>CuO<sub>4</sub>.

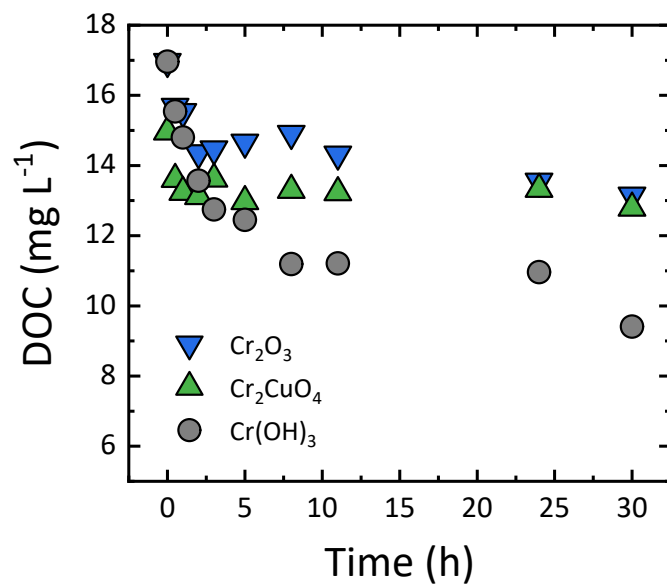

**Fig. S1.** The dynamic changes in DOC of aqueous SLOM in the presence of different Cr (hydr)oxides.

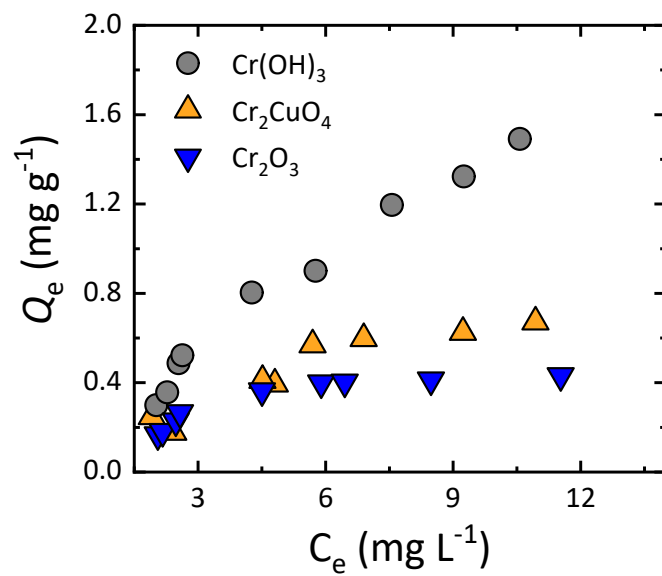

**Fig. S2.** Adsorption isotherms of TOC of SLOM on the different Cr (hydr)oxides.

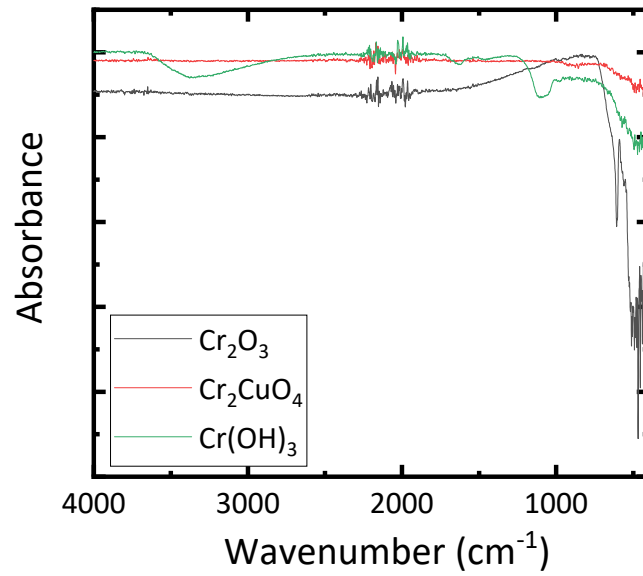

**Fig. S3.** FTIR spectrum of Cr(OH)<sub>3</sub>, Cr<sub>2</sub>CuO<sub>4</sub>, and Cr<sub>2</sub>O<sub>3</sub> samples.

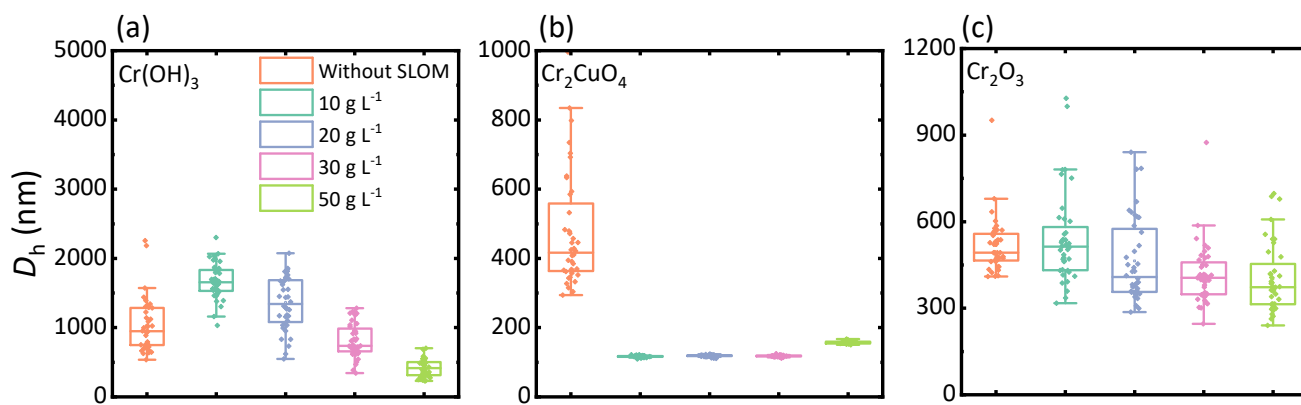

**Fig. S4** Box plots of hydrodynamic diameter ( $D_h$ ) of (a)  $\text{Cr}(\text{OH})_3$ , (b)  $\text{Cr}_2\text{CuO}_4$ , and (c)  $\text{Cr}_2\text{O}_3$  under different SLOM loadings.

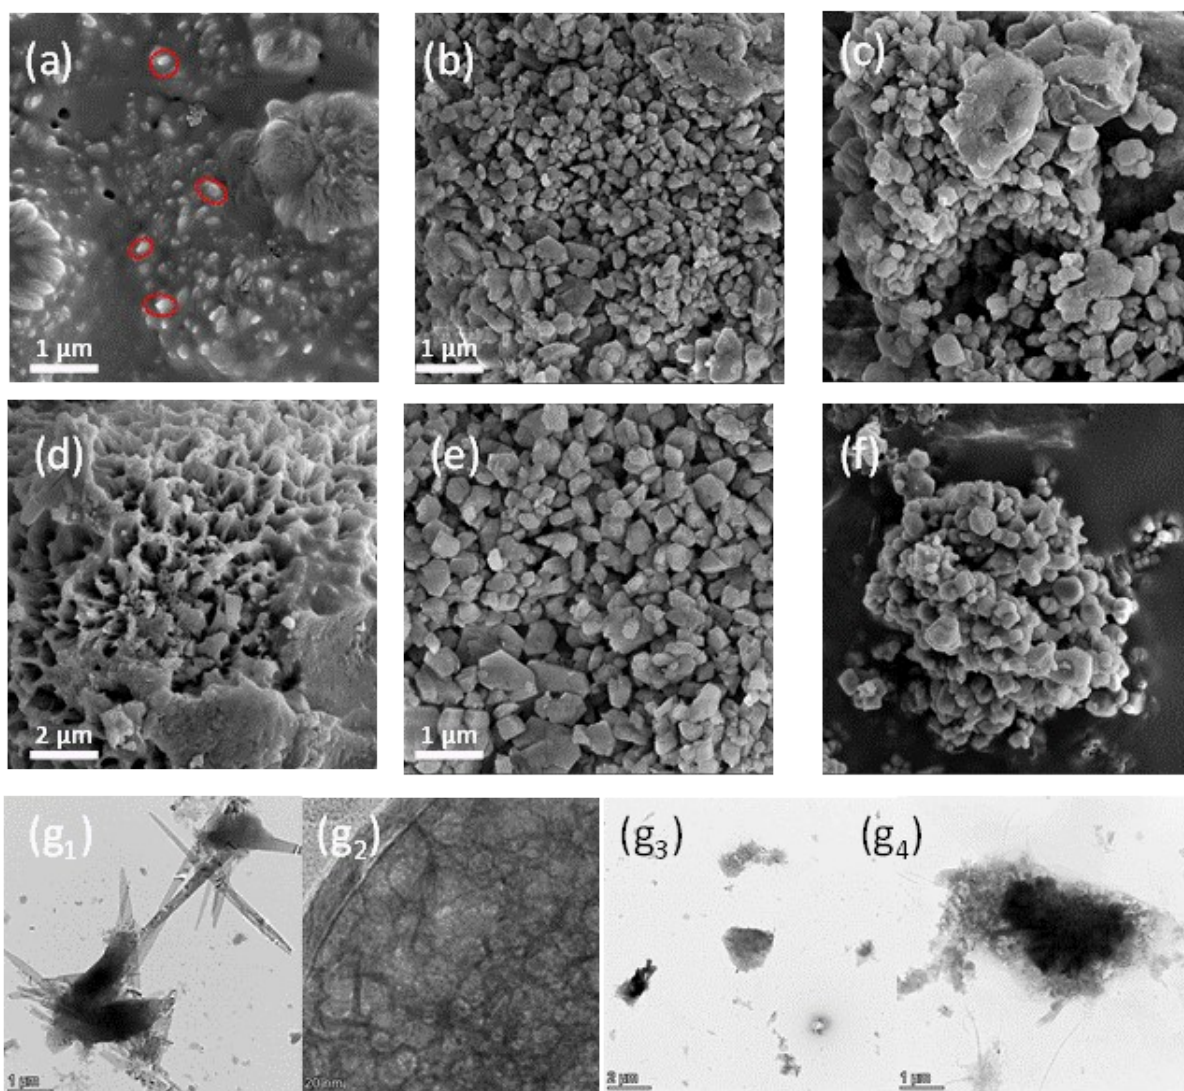

**Fig. S5** SEM images of different Cr (hydr)oxide colloids in the presence of SLOM. (a) and (d) referred to  $\text{Cr}(\text{OH})_3$ , (b) and (e) referred to  $\text{Cr}_2\text{CuO}_4$ , and (c) and (f) referred to  $\text{Cr}_2\text{O}_3$ . The TEM images of (g<sub>1</sub>) and (g<sub>2</sub>)  $\text{Cr}(\text{OH})_3$  and (g<sub>3</sub>) and (g<sub>4</sub>)  $\text{Cr}_2\text{O}_3$ .



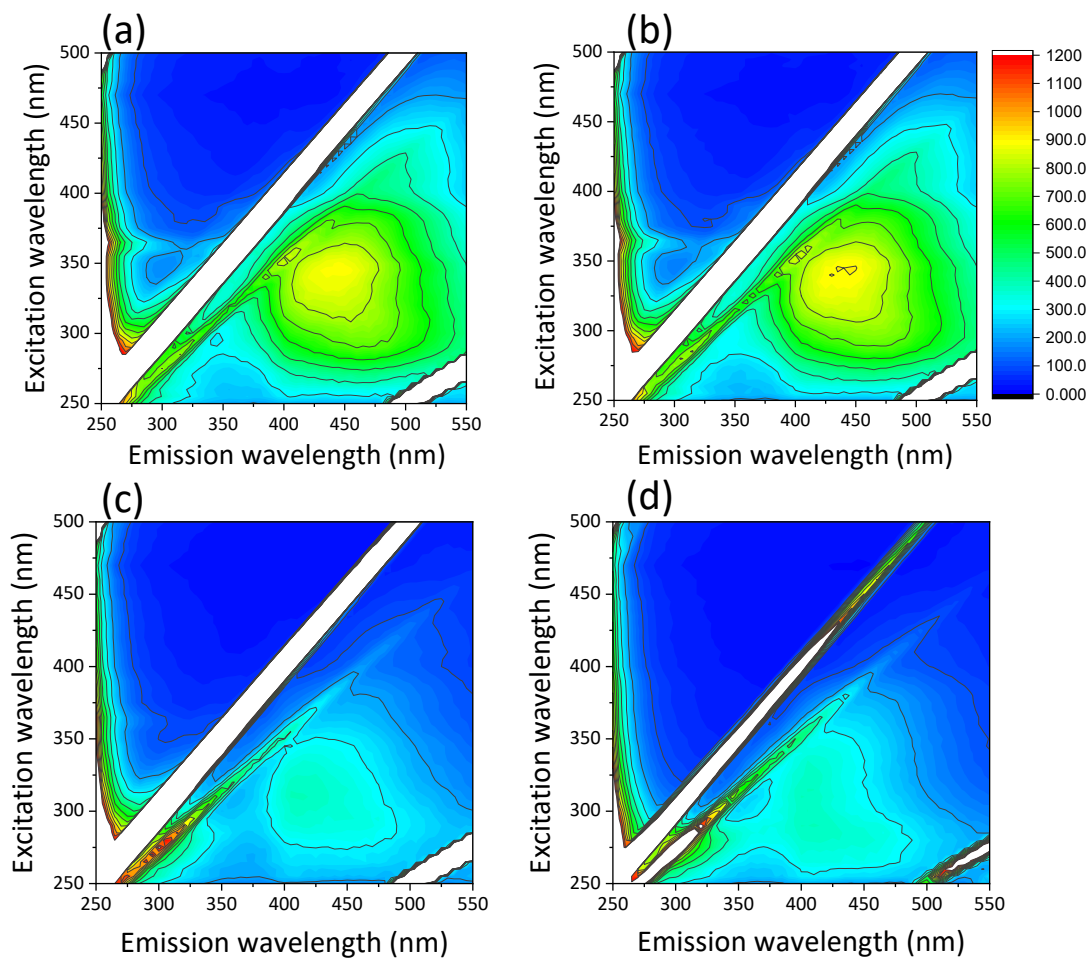

**Fig. S6** Changes in EEM spectrum: (a) original SLOM and the SLOM in the presence (b)  $\text{Cr}_2\text{O}_3$ , (c)  $\text{Cr}_2\text{CuO}_4$ , and (d)  $\text{Cr}(\text{OH})_3$ .

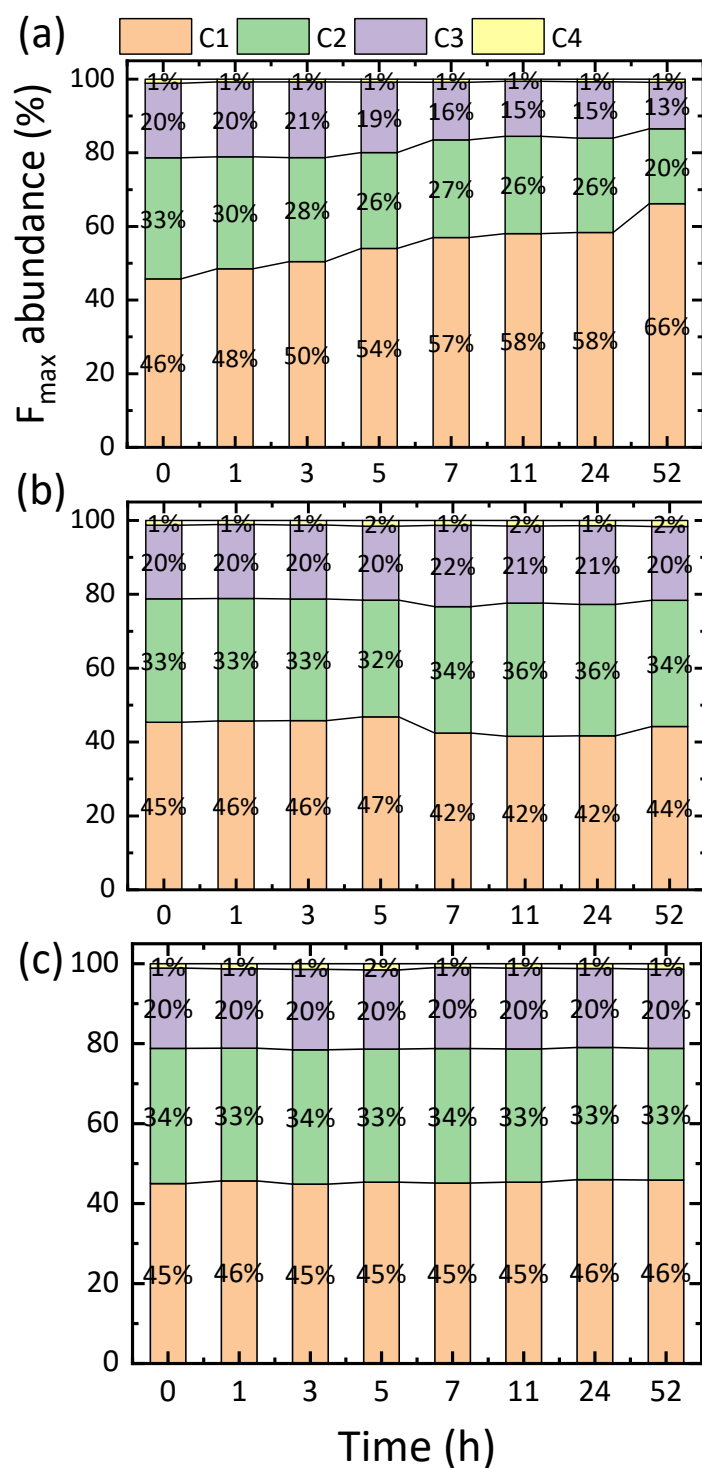

**Fig. S7** Changes in  $F_{\max}$  abundance (%) of four components in SLOM due to interaction with (a)  $\text{Cr}(\text{OH})_3$ , (b)  $\text{Cr}_2\text{CuO}_4$ , and (c)  $\text{Cr}_2\text{O}_3$ . Four components in SLOM were determined by fluorescent loadings in EEM spectra and PARAFAC analysis.

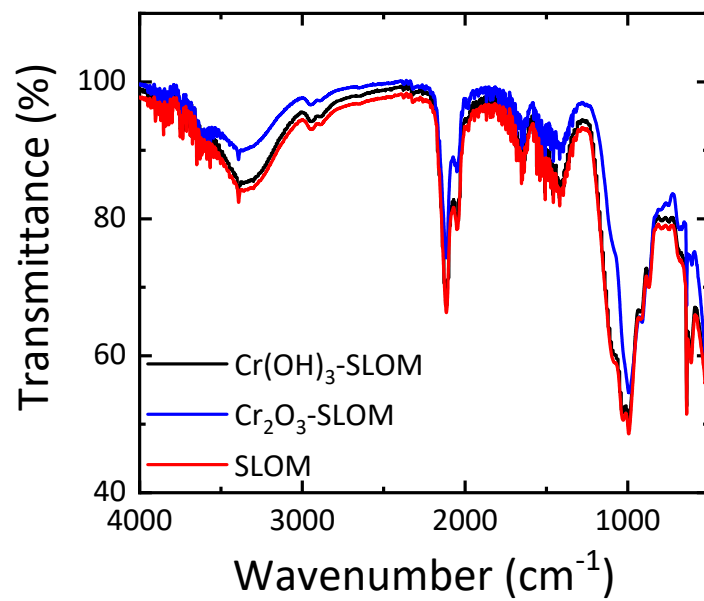

**Fig. S8** FTIR spectrum of aqueous SLOM in the presence of different Cr (hydr)oxides.

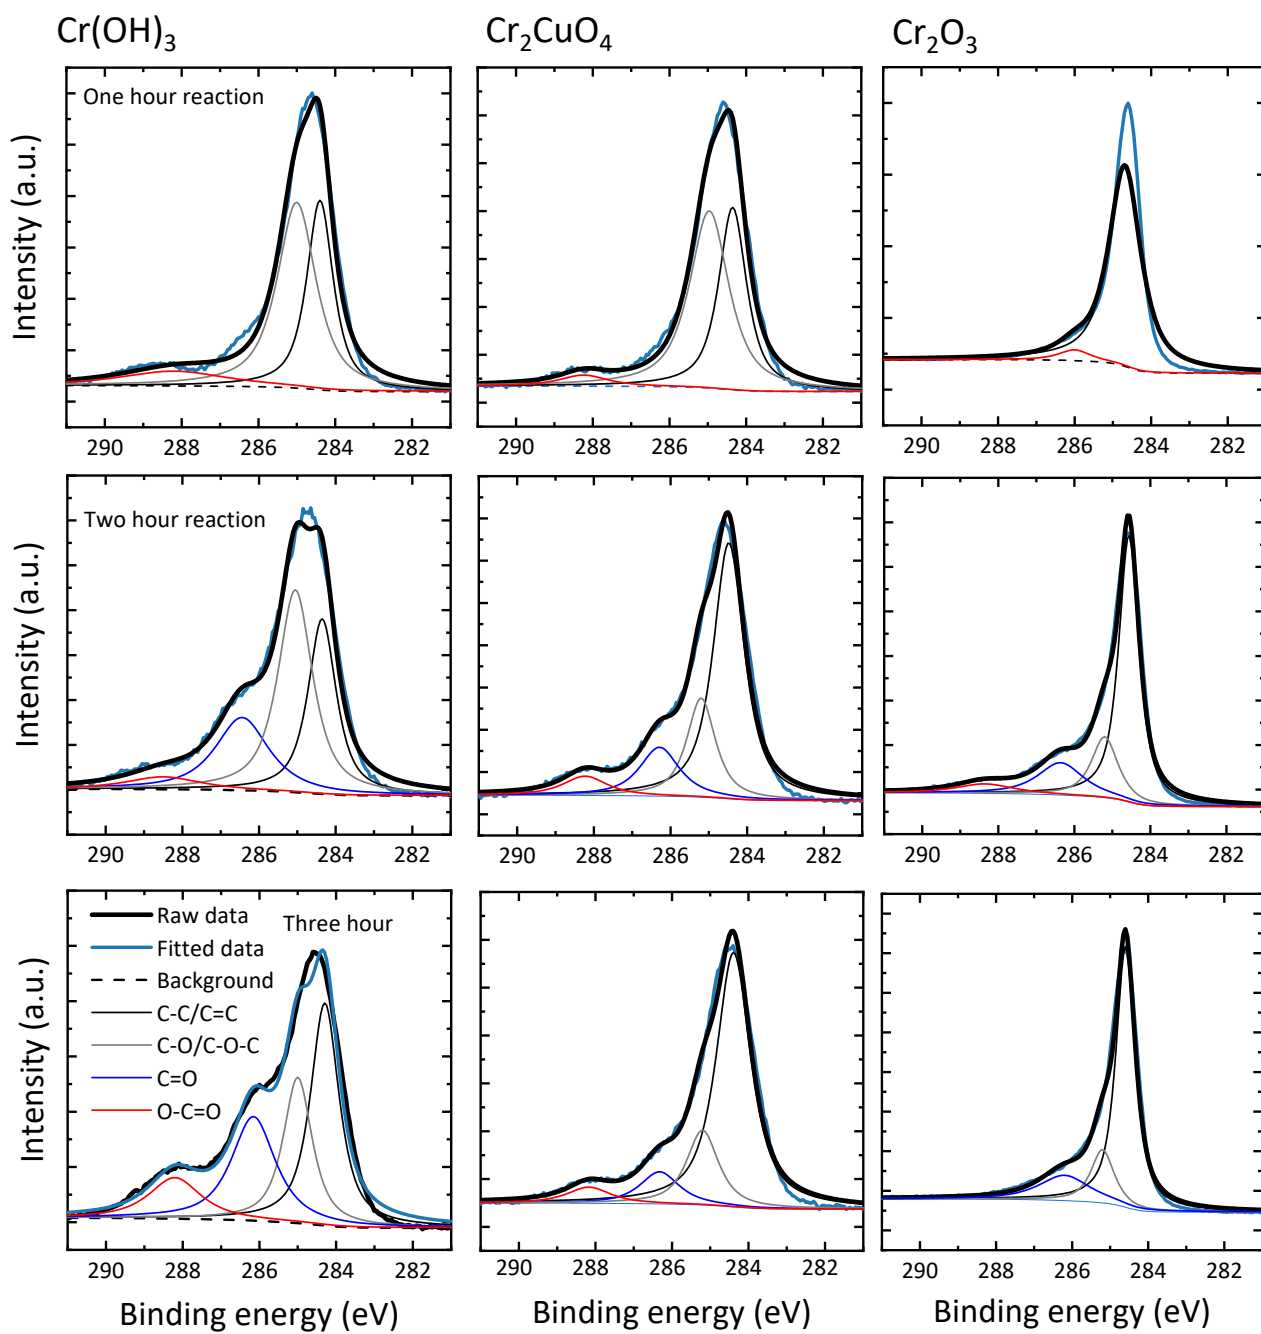

**Fig. S9** The deconvoluted peaks of C-C/C=C, C-O/C-O-C, C=O, and O-C=O of different Cr (hydr)oxides in the presence of SLOM using XPS analysis. From upper to downline, the figures referred to the different reaction times. Left column figures referred to  $\text{Cr}(\text{OH})_3$ , middle column figures referred to  $\text{Cr}_2\text{CuO}_4$ , and right column figures referred to  $\text{Cr}_2\text{O}_3$ .

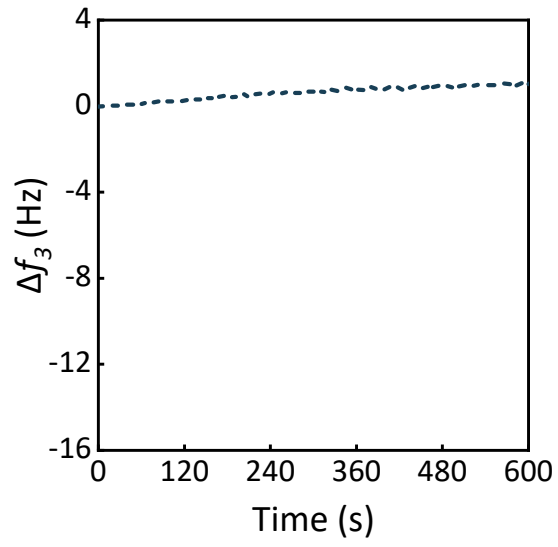

**Fig. S10** The changes in the frequency of SLOM alone.

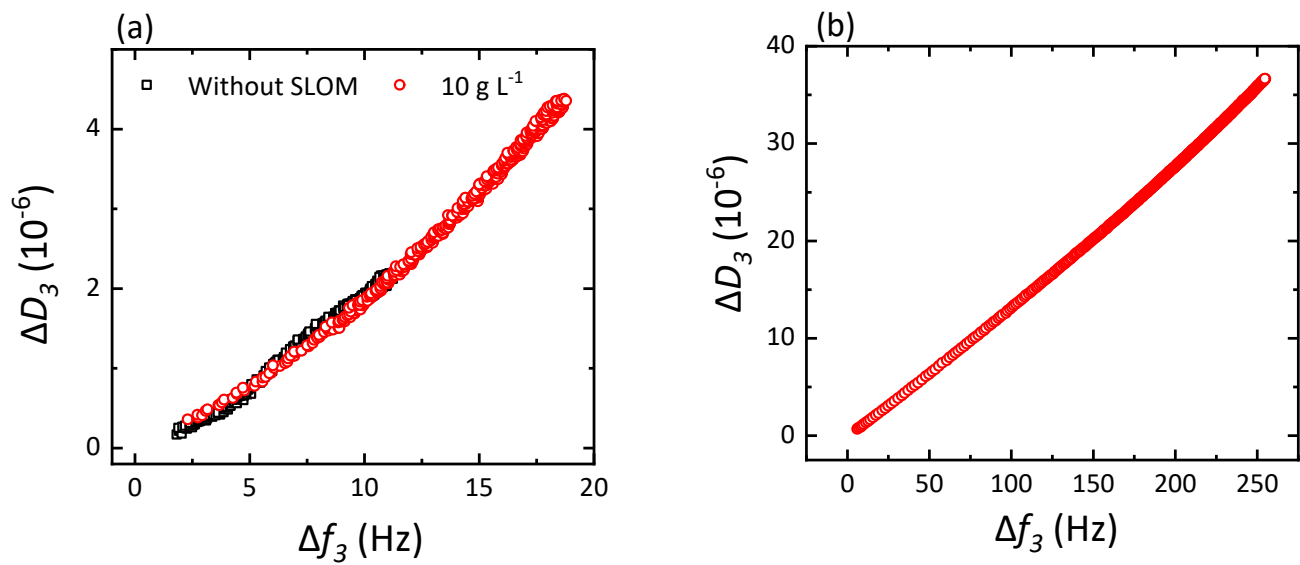

**Fig. S11** The changes in the dissipation of  $\text{Cr}(\text{OH})_3$  colloids as a function of frequency shifts with 0 and  $10 \text{ g L}^{-1}$  loading SLOM (a) and under highest SLOM loading (b).
